# Supplementary material for: Investigating the predictability of Marine Heatwaves at subseasonal to seasonal timescales in New Caledonia, South Pacific
Source: Copernicus journal article supplement (doi:10.5194/egusphere-2025-5995), 2025-12-11

lead = 0-30 days

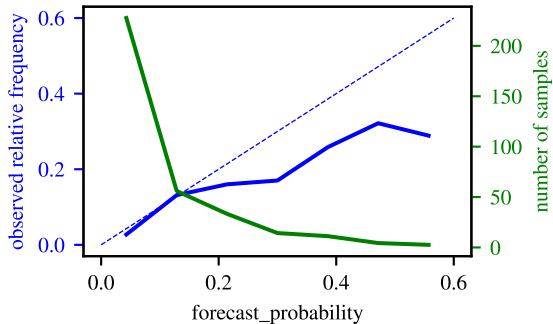

lead = 30-212 days

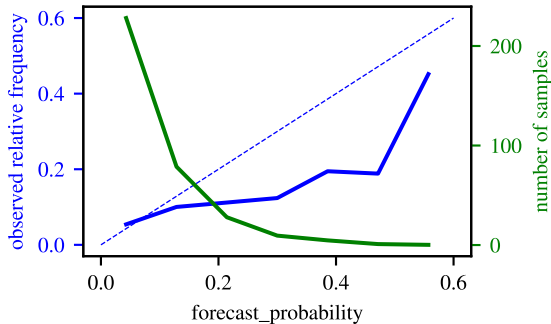

lead = 0-30 days

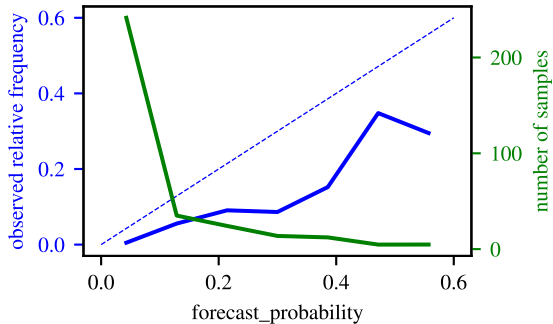

lead = 30-212 days

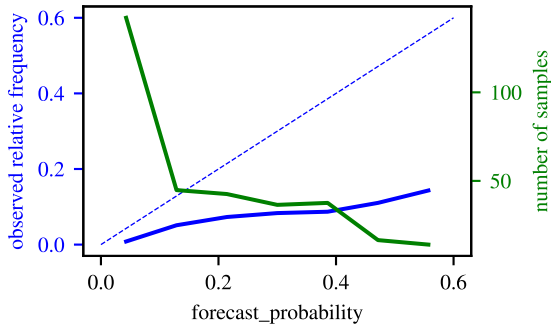

lead = 0-30 days

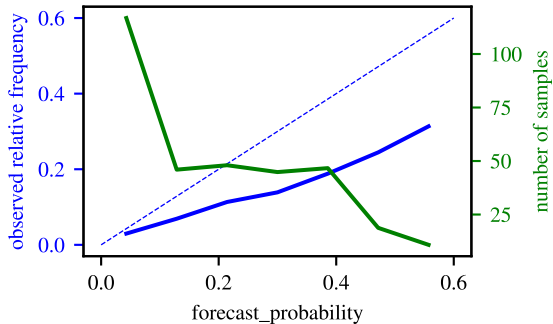

lead = 30-212 days

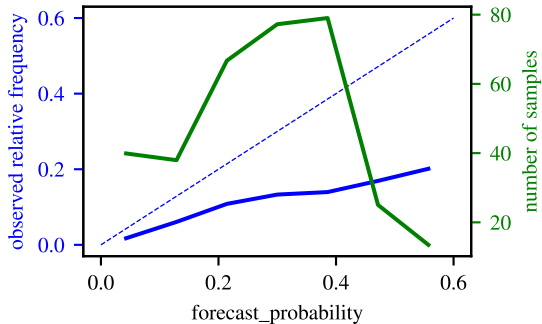

lead = 0-30 days

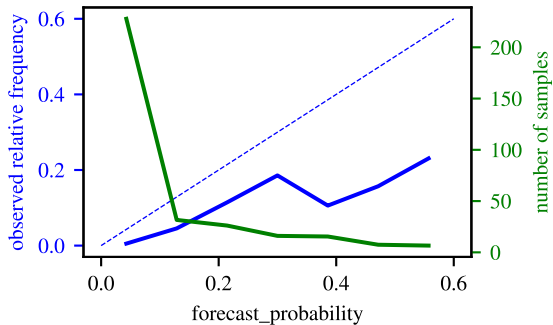

lead = 30-212 days

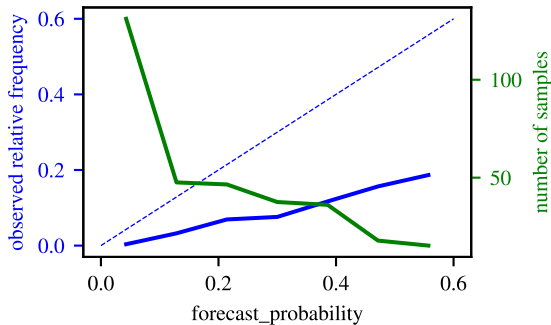

lead = 0-30 days

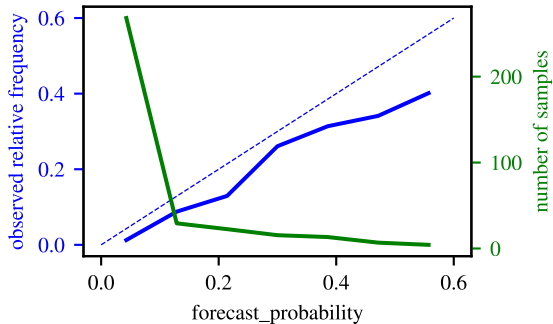

lead = 30-212 days

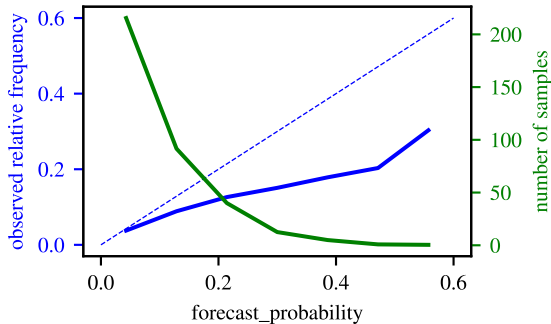

lead = 0-30 days

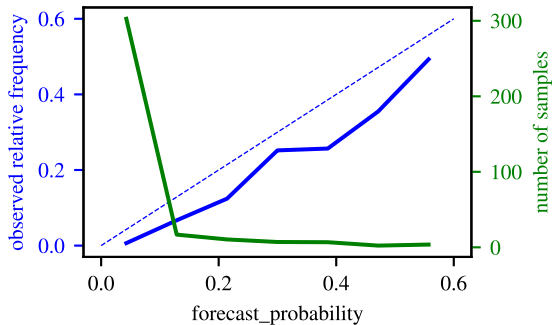

lead = 30-212 days

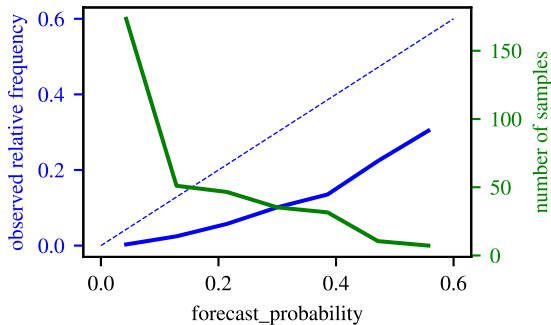

lead = 0-30 days

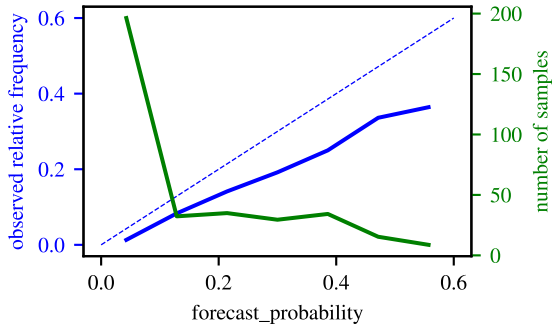

lead = 30-212 days

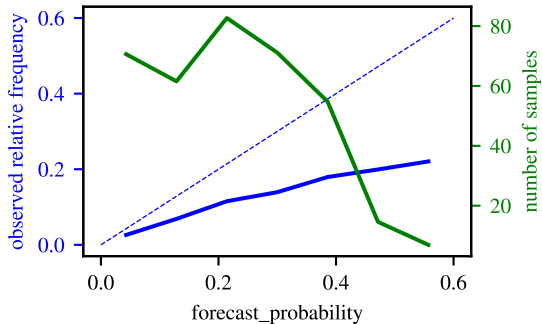

lead = 0-30 days

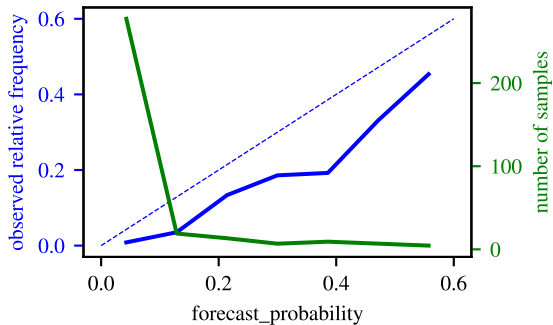

lead = 30-212 days

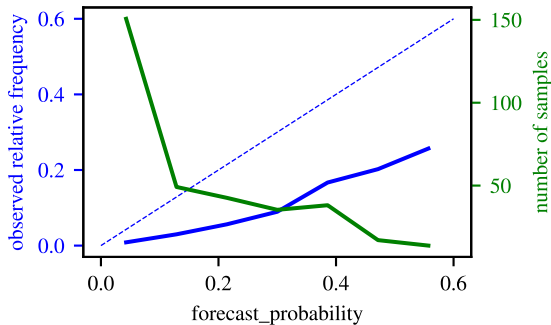

Supplement: Supplementary file [file egusphere-2025-5995-AC2-supplement.pdf]
