# Supplementary material for: Investigating the predictability of Marine Heatwaves at subseasonal to seasonal timescales in New Caledonia, South Pacific
Source: Copernicus journal article supplement (doi:10.5194/egusphere-2025-5995), 2025-12-11

a) Number of MHW days per month

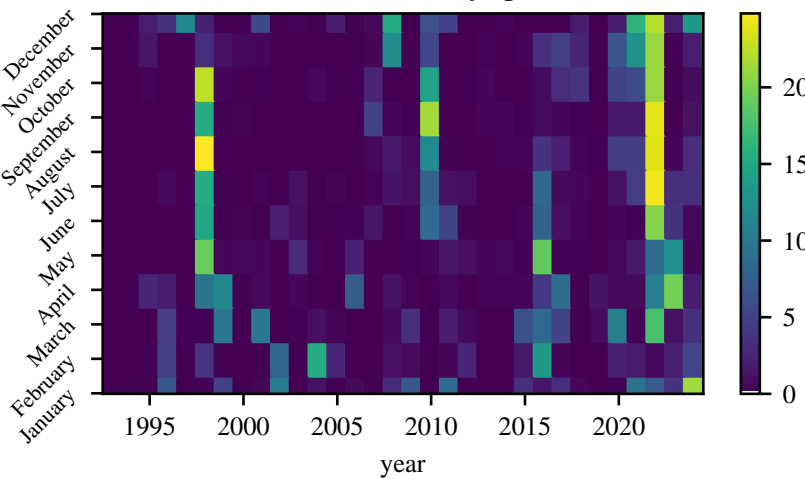

b) Surface fraction in MHW state

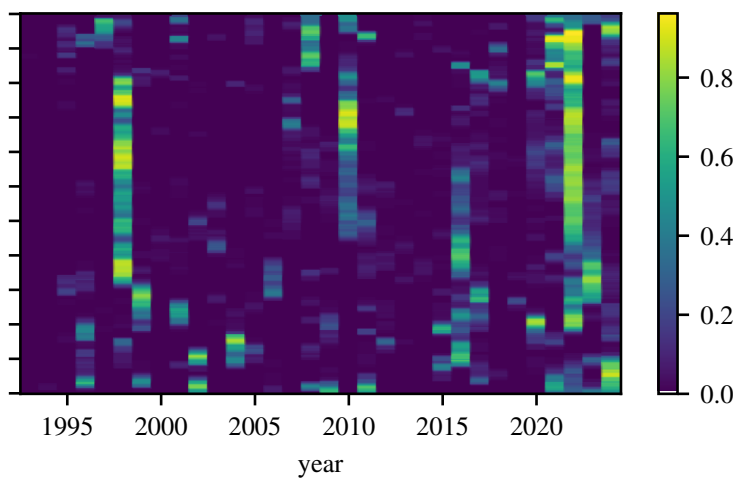

c)

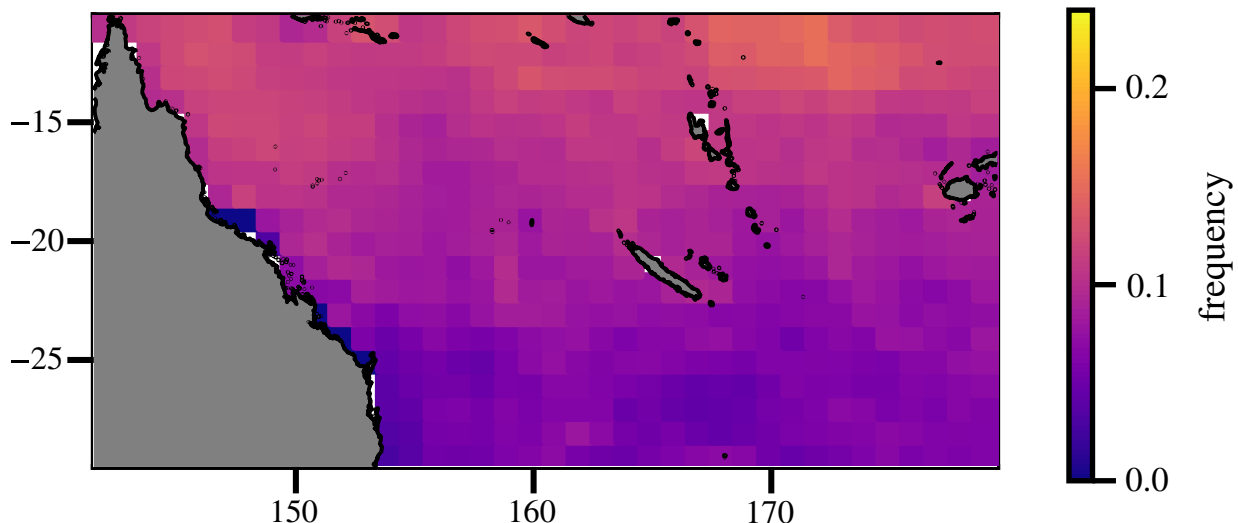

Supplement: Supplementary file [file egusphere-2025-5995-AC1-supplement.pdf]
